# Supplementary material for: IoT in Radiology: Using Raspberry Pi to Automatically Log Telephone Calls in the Reading Room
Source: J Digit Imaging. 2018 May 3;31(3):371–8. doi: 10.1007/s10278-018-0081-z (PMC5959834; doi:10.1007/s10278-018-0081-z)
Supplement: Supplementary file 7 — (PY 5 kb) [file 10278_2018_81_MOESM7_ESM.py]

#!/usr/bin/python
# Author: Nathan Cross MD MS, Po-Hao Chen MD MBA
# Copyright (c) 2017 Nathan Cross, Po-Hao Chen MD MBA

# Acknowledgements
# Some of the libraries used are from Adafruit Industries who holds the
# copyright.  Please see individual files for details.

# Notes
# This file is to test the raspberry pi with an Adafruit 128px x 64px OLED
# display.

# Libraries
from time import sleep, gmtime, localtime, strftime, time
from gpiozero import Button, LED
import Adafruit_GPIO.SPI as SPI
import Adafruit_SSD1306
from PIL import Image
from PIL import ImageDraw
from PIL import ImageFont
import paho.mqtt.client as mqtt
import paho.mqtt.publish as publish


# Setup Pins
button1_pin = 17
button2_pin = 12
led1_pin = 27
led2_pin = 22
button1 = Button(button1_pin)
button2 = Button(button2_pin)
led1 = LED(led1_pin)
led2 = LED(led2_pin)
reed_pin = 5
reed = Button(reed_pin, pull_up=True, bounce_time=1)

# OLED Pin Configuration for Raspberry Pi
RST = None      # not using oled rst pin
DC = 23
SPI_PORT = 0
SPI_DEVICE = 0

# MQTT Configuration
# Details for free MQTT service which we are registering data to.
client_id = "RadIOT_phone1" # Customized unique name for your device
server = "iot.eclipse.org"  # Eclipse's free test server
location = "testLocation"   # Customized unqiue name for your location

# 128x64 display using hardware SPI interface:
disp = Adafruit_SSD1306.SSD1306_128_64(rst=RST, dc=DC, spi=SPI.SpiDev(SPI_PORT, SPI_DEVICE, max_speed_hz=8000000))

# Instantiate and initialize object
disp.begin()

# Wipe display buffer and output to screen
disp.clear()
disp.display()

# Obtain display width and height
width = disp.width
height = disp.height

# Load font.
font = ImageFont.load_default()

# Defaults
padding = -1
top = padding
bottom = height-padding

# Starting X-location on screen
x = 0

# Create black and white image canvas object
image = Image.new('1', (width,height))
# Instantiate drawing object on image canvas
draw = ImageDraw.Draw(image)

# Draw black background image
draw.rectangle((0,0,width,height), outline=0, fill=0)


# Basic MQTT functions
def init_mqtt():
    client=mqtt.Client(client_id)
    client.connect(server)
    return client

def mqtt_publish(c, txt):
    result = c.publish("/".join([location, client_id]),
                       "@".join([txt, str(time())]))
    if (result[0] == mqtt.MQTT_ERR_SUCCESS):
        print("Successfully published message", txt)
    else:
        print("Failed publishing message", txt, ". Error code", result[0])

# Initialize mqtt connection and return handle
mqttc = init_mqtt();

# wipes display and turns off leds
def clearOutput():
    led1.off()
    led2.off()
    draw.rectangle((0,0,width,height), outline=0, fill=0)
    disp.clear()
    disp.display()
    return True

# Startup screen
clearOutput()
print("Telephone Logger v1")
draw.text((x, top), str("Telephone Logger"), font=font, fill=255)
draw.text((x, top+16), str("  Loading..."), font=font, fill=255)
disp.image(image)
disp.display()

sleep(2)

clearOutput()
draw.text((x, top+24), str("        ..."), font=font, fill=255)
disp.image(image)
disp.display()

def ask_question():
    led1.on()
    led2.on()
    draw.rectangle((0,0,width,height), outline=0, fill=0)
    draw.text((x, top), str("Press appropriate"), font=font, fill=255)
    draw.text((x, top+8), str(" response."), font=font, fill=255)
    draw.text((x, top+24), str("Question 1"), font=font, fill=255)
    disp.image(image)
    disp.display()
    while True:
        if button1.is_pressed:
            message = "Button 1 Pressed - " + strftime("  %a, %d %b %Y, %H:%M:%S", localtime())
            print(message)
            mqtt_publish(mqttc, message)

            led2.off()
            led1.on()
            draw.rectangle((0,0,width,height), outline=0, fill=0)
            draw.text((x, top+8), str(strftime("  %a, %d %b %Y", localtime())), font=font, fill=255)
            draw.text((x, top+16), str(strftime("      %H:%M:%S", localtime())), font=font, fill=255)
            draw.text((x, top+24), str("      Button 1"), font=font, fill=255)
            draw.text((x, top+32), str("      Pressed"), font=font, fill=255)
            disp.image(image)
            disp.display()
            sleep(3)

            draw.rectangle((0,0,width,height), outline=0, fill=0)
            draw.text((x, top+24), str("Sleeping..."), font=font, fill=255)
            disp.image(image)
            disp.display()
            sleep(1)
            clearOutput()
            break
        if button2.is_pressed:
            message = "Button 2 Pressed - " + strftime("  %a, %d %b %Y, %H:%M:%S", localtime())
            print(message)
            mqtt_publish(mqttc, message)

            led2.off()
            led1.on()
            draw.rectangle((0,0,width,height), outline=0, fill=0)
            draw.text((x, top+8), str(strftime("  %a, %d %b %Y", localtime())), font=font, fill=255)
            draw.text((x, top+16), str(strftime("      %H:%M:%S", localtime())), font=font, fill=255)
            draw.text((x, top+24), str("      Button 2"), font=font, fill=255)
            draw.text((x, top+32), str("      Pressed"), font=font, fill=255)
            disp.image(image)
            disp.display()
            sleep(3)

            draw.rectangle((0,0,width,height), outline=0, fill=0)
            draw.text((x, top+24), str("Sleeping..."), font=font, fill=255)
            disp.image(image)
            disp.display()
            sleep(1)
            clearOutput()
            break

    return True

while True:
    reed.when_pressed = ask_question
